CORRECTION

# Correction: A Modular Analysis of the Auxin Signalling Network

Etienne Farcot, Cyril Lavedrine, Teva Vernoux

[Fig 3](#) is incorrect. Please see the corrected [Fig 3](#) here.

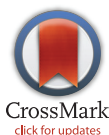

## OPEN ACCESS

**Citation:** Farcot E, Lavedrine C, Vernoux T (2015) Correction: A Modular Analysis of the Auxin Signalling Network. PLoS ONE 10(6): e0131622. doi:10.1371/journal.pone.0131622

**Published:** June 24, 2015

**Copyright:** © 2015 Farcot et al. This is an open access article distributed under the terms of the [Creative Commons Attribution License](#), which permits unrestricted use, distribution, and reproduction in any medium, provided the original author and source are credited.

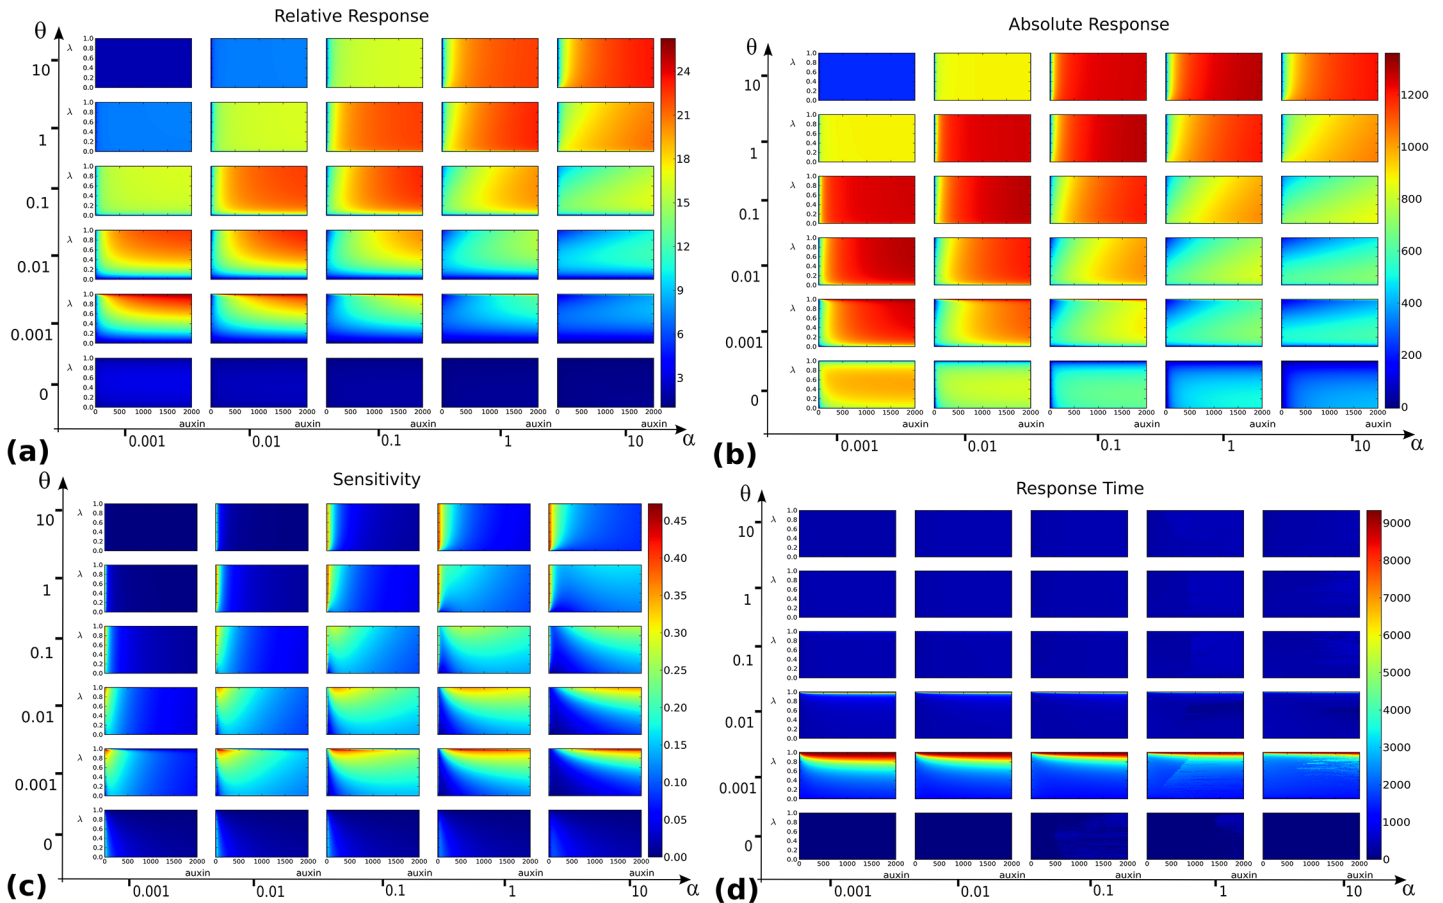

**Fig 3. Output landscapes as functions of auxin level  $x$  (abscissae) and balance between the two core mechanisms, parametrized by  $\lambda$  (ordinates).** (a) Relative response  $\rho_{rel}(x, \lambda)$ . (b) Absolute response  $\rho_{abs}(x, \lambda)$ . (c) Sensitivity  $\sigma(x, \lambda)$ . (d) Response time  $\tau(x, \lambda)$ . For each of these functions, the grid of values  $(\alpha, \theta) \in \{0.001, 0.01, 0.1, 1, 10\} \times \{0, 0.001, 0.01, 0.1, 1, 10\}$  is considered and for each landscape  $(x, \lambda)$  span a  $200 \times 200$  regular grid on the rectangle  $[0, 2000] \times [0, 1]$ .

doi:10.1371/journal.pone.0131622.g001

## Reference

1. Farcot E, Lavedrine C, Vernoux T (2015) A Modular Analysis of the Auxin Signalling Network. PLoS ONE 10(3): e0122231. doi:10.1371/journal.pone.0122231 PMID: 25807071
